# Supplementary material for: Characteristics and determinants of sexual behavior among adolescents of migrant workers in Shangai (China)
Source: Springer Nature journal article supplement (doi:10.1186/1471-2458-9-195), 2009-06-19
Supplement: Additional file 1 [file 1471-2458-9-195-s1.doc]

**Table 5.** Factors predicting sexual intercourse during past 3 months by logistic regression models: differences by study groups

|  | Adolescents of  migrant workers  (N=252) | |  | Adolescents of  general residents  (N=2569) | |  | The total adolescents  (N=2821) | |
| --- | --- | --- | --- | --- | --- | --- | --- | --- |
| B | OR(95%CI) |  | B | OR(95%CI) |  | B | OR(95%CI) |
| Migration |  |  |  |  |  |  |  |  |
| Yes |  | - |  |  | - |  | 0.21 | 1.23 (1.01-1.72) * |
| No |  | - |  |  | - |  |  | 1.00 |
| Age | 0.41 | 1.51 (1.01-2.26) * |  | 0.71 | 2.04 (1.71-2.44) ** |  | 0.68 | 1.88 (1.51-2.34) ** |
| Gender |  |  |  |  |  |  |  |  |
| male |  | NS |  |  | NS |  |  | NS |
| Female |  | 1.00 |  |  | 1.00 |  |  | 1.00 |
| Father’s educational |  |  |  |  |  |  |  |  |
| Middle school and below |  | NS |  |  | NS |  |  | NS |
| High school |  | NS |  |  | NS |  |  | NS |
| College and above |  | 1.00 |  |  | 1.00 |  |  | 1.00 |
| Mother’s educational |  |  |  |  |  |  |  |  |
| Middle school and below |  | NS |  |  | NS |  |  | NS |
| High school |  | NS |  |  | NS |  |  | NS |
| College and above |  | 1.00 |  |  | 1.00 |  |  | 1.00 |
| Family income |  |  |  |  |  |  |  |  |
| Low (<1000) | 0.41 | 2.22 (1.09-3.05) ** |  |  | NS |  | 0.43 | 2.89 (1.42-4.01) ** |
| Medium (1000-2499) | 0.18 | 1.25 (1.04-1.59) * |  |  | NS |  |  | NS |
| High (≥2500) |  | 1.00 |  |  | 1.00 |  |  | 1.00 |
| Antecedent sexual behaviors |  |  |  |  |  |  |  |  |
| Often/usually |  | NS |  | 1.01 | 3.21 (1.67-5.01) ** |  | 0.56 | 2.28 (1.22-4.83) ** |
| No/occasional |  | NS |  |  | 1.00 |  |  | 1.00 |
| Cigarette smoking |  |  |  |  |  |  |  |  |
| Often/usually |  | NS |  |  | NS |  |  | NS |
| No/occasional |  | 1.00 |  |  | 1.00 |  |  | 1.00 |
| Drunk |  |  |  |  |  |  |  |  |
| Often/usually |  | NS |  | 0.56 | 2.23 (1.31-3.89) ** |  |  | NS |
| No/occasional |  | 1.00 |  |  | 1.00 |  |  | 1.00 |
| Drug use |  |  |  |  |  |  |  |  |
| Yes |  | NS |  |  | NS |  |  | NS |
| No |  | 1.00 |  |  | 1.00 |  |  | 1.00 |
| Close relationship with high- risk persons |  |  |  |  |  |  |  |  |
| Yes |  | NS |  |  | NS |  |  | NS |
| No |  | 1.00 |  |  | 1.00 |  |  | 1.00 |
| Age of first sexual intercourse |  |  |  |  |  |  |  |  |
| <15 | 0.30 | 1.24 (1.09-1.57) * |  |  | NS |  | 0.42 | 1.36 (1.02-1.88) * |
| ≥15 |  | 1.00 |  |  | 1.00 |  |  | 1.00 |
| Score 1 | -0.07 | 0.93 (0.90-0.97) * |  |  |  |  |  | NS |
| Score 2 |  | NS |  | -0.13 | 0.88 (0.82-0.94) ** |  |  | NS |
| Score 3 |  | NS |  |  |  |  |  | NS |
| Score 4 |  | NS |  | -0.28 | 0.75 (0.65-0.83) ** |  |  | NS |
| Score 5 | -0.11 | 0.79 (0.66-0.92) * |  |  |  |  |  | NS |

Family income was expressed in RMB(yuan)/person/month.

Antecedent sexual behaviors refer to petting, kiss, and masturbation.

Score 1: scores in subscale of HIV/AIDS knowledge

Score 2: scores in subscale of attitude toward sex behaviors

Score 3: scores in subscale of attitude toward person with HIV/AIDS

Score 4: scores in subscale of protection self-efficacy

Score 5: scores in subscale of communication on sex/ HIV/AIDS issue

OR, odds ratio

CI, confidence interval

NS: no significance

* *P*<0.05

** *P*<0.01
